# Supplementary material for: L-phenylalanine Increased Gut Hormone Secretion through Calcium-Sensing Receptor in the Porcine Duodenum
Source: PubMed Central journal article supplement (PMC6719913; doi:10.3390/ani9080476), 2019-07-24
Supplement: animals-09-00476-s001.pdf [file animals-09-00476-s001.pdf]

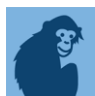

# Supplementary File: L-phenylalanine Increased Gut Hormone Secretion through Calcium-Sensing Receptor in the Porcine Duodenum

Jiangyin Feng, Cuicui Kang, Chao Wang, Liren Ding, Weiyun Zhu and Suqin Hang \*

Table S1. Primers used in present study.

| Targets        | Gene Bank No.  | Primers Sequences                                                             |
|----------------|----------------|-------------------------------------------------------------------------------|
| CaSR           | NM_001278748.1 | Sense: 5'-CGGGGGACTCTTTCTATTC-3'<br>Anti-sense: 5'-GCTGGGCTGCTGTTTATTC-3'     |
| CCK            | NM_214237.2    | Sense: 5'-CTTGTGCCTGTGTGTGCTG-3'<br>Anti-sense: 5'-AGATACTCGGCCAGAAGGTG-3'    |
| GIP            | NM_001287408.1 | Sense: 5'-TTCTGTCTGCTGCTGGTGTC-3'<br>Anti-sense: 5'-CTCCCTCTGGGTGATGTTGT-3'   |
| GAPDH          | NM_001206359.1 | Sense: 5'-ATGGTGAAGGTCGGAGTGAAC-3'<br>Anti-sense: 5'-CTCGCTCCTGGAAGATGGT-3'   |
| $\beta$ -actin | DQ178122.1     | Sense: 5'-TCTGGCACCACACCTTCTACA-3'<br>Anti-sense: 5'-ATCTGGGTCATCTTCTCACGG-3' |

CaSR: calcium-sensing receptor; CCK: cholecystokinin; GIP: glucose-dependent insulintropic peptide; GAPDH: glyceraldehyde phosphate dehydrogenase.

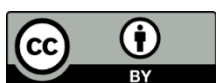

© 2019 by the authors. Licensee MDPI, Basel, Switzerland. This article is an open access article distributed under the terms and conditions of the Creative Commons Attribution (CC BY) license (<http://creativecommons.org/licenses/by/4.0/>).
